# Supplementary material for: ChatGPT v4 outperforming v3.5 on cancer treatment recommendations in quality, clinical guideline, and expert opinion concordance
Source: PubMed Central journal article supplement — Digit Health. 2024 Aug 14;10:20552076241269538. doi: 10.1177/20552076241269538 (PMC11325467; doi:10.1177/20552076241269538), 2024-08-14
Supplement: sj-pdf-1-dhj-10.1177_20552076241269538.pdf [file sj-pdf-1-dhj-10.1177_20552076241269538.pdf]

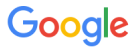

cancer treatment chatGPT

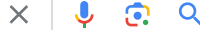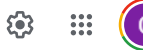

All News Images Videos Maps More Tools

SafeSearch

About 32,000,000 results (0.32 seconds)

ChatGPT, an artificial intelligence (AI) system that answers questions and prompts in a conversational manner, failed to provide the correct recommendation for cancer care approximately one-third of the times it was asked, according to research that was recently published in JAMA Oncology. Aug 28, 2023

Curetoday https://www.curetoday.com › view › chatgpt-often-fails-t...

### ChatGPT Often Fails to Recommend Correct Cancer Treatments

About featured snippets Feedback

Harvard Gazette https://news.harvard.edu › gazette › story › 2023/08

### Need cancer treatment advice? Forget ChatGPT

Aug 29, 2023 — New research finds in about a third of the cases AI chatbot provided medically inappropriate recommendations for cancer treatment.

American Hospital Association https://www.aha.org › 2023-09-05-chatgpts-performa...

### ChatGPT's Performance Found Lacking on Cancer ...

Sep 5, 2023 — ChatGPT has problems with accuracy in making cancer treatment recommendations, according to a study recently published in JAMA Oncology.

News-Medical.net https://www.news-medical.net › news › ChatGPT-35-p...

### ChatGPT 3.5 provides inappropriate cancer treatment ...

Aug 25, 2023 — ChatGPT 3.5 provides inappropriate cancer treatment recommendations in one-third of cases, study shows ... For many patients, the internet serves ...

medRxiv https://www.medrxiv.org › content

### The utility of ChatGPT for cancer treatment information

Mar 23, 2023 — This study evaluated the performance and robustness of ChatGPT in providing breast, prostate, and lung cancer treatment recommendations that ...

Bloomberg https://www.bloomberg.com › news › articles › chatgp...

### OpenAI's ChatGPT Fails to Recommend Cancer Treatment ...

Aug 24, 2023 — Computer-designed cancer treatment plans generated by OpenAI Inc.'s ChatGPT were plagued with a familiar problem, researchers at Brigham and ...

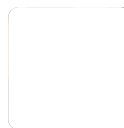

 Business Insider  
<https://www.businessinsider.com> > News

## ChatGPT Generates Error-Filled Cancer Treatment Plans

Aug 25, 2023 — Study finds that **ChatGPT** provided false information when asked to design **cancer treatment** plans. The chatbot mixed correct and incorrect ...

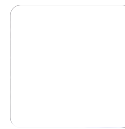

 Pharmacy Times  
<https://www.pharmacytimes.com> > view > study-one-t...

## Study: One-Third of ChatGPT's Cancer Treatment ...

Aug 28, 2023 — Investigators found that artificial intelligence chatbots did not consistently provide recommendations for **cancer treatment** that correspond ...

 AuntMinnie  
<https://www.auntminnie.com> > article > are-chatgpt-ca...

## Are ChatGPT cancer treatment recommendations ...

Aug 24, 2023 — Over three-fifths of **treatments** recommended by **ChatGPT-3.5 Turbo** are at least partially not concordant with National Comprehensive **Cancer** ...

 The ASCO Post  
<https://ascopost.com> > news > august-2023 > how-gui...

## How Guideline-Concordant Are Cancer Treatment ...

Aug 29, 2023 — In the new study, the researchers evaluated the extent to which **ChatGPT's** recommendations aligned with NCCN Guidelines® by prompting the AI ...

 Drug Topics  
<https://www.drugtopics.com> > view > chatgpt-often-pr...

## ChatGPT Often Provides Inaccurate Cancer Treatment ...

Aug 24, 2023 — **ChatGPT** Often Provides Inaccurate **Cancer Treatment** Recommendations ...  
A new study found that 34% of the chatbot's answers included 1 or more ...

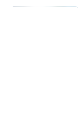

 New York Post  
<https://nypost.com> > 2023/08/25 > chatgpts-cancer-tre...

## ChatGPT's cancer treatment advice 'potentially dangerous'

Aug 25, 2023 — **ChatGPT** spewed out **cancer treatment** regimens that contained a "potentially dangerous" mixture of correct and false information, according to ...

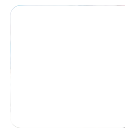

 Science Daily  
<https://www.sciencedaily.com> > releases > 2023/08

## ChatGPT shows limited ability to recommend guidelines- ...

Aug 24, 2023 — They focused on the three most common **cancers** (breast, prostate and lung **cancer**) and prompted **ChatGPT** to provide a **treatment** approach for each ...

 The Economic Times  
<https://economictimes.indiatimes.com> > articleshow

## ChatGPT shows 'inappropriate recommendation' for cancer

...
